# Supplementary material
Source: ML conference proceedings conference paper supplement (https://proceedings.neurips.cc/paper_files/paper/2021/hash/ac6b3cce8c74b2e23688c3e45532e2a7-Abstract.html)
Supplement: Supplementary file 1 [file ac6b3cce8c74b2e23688c3e45532e2a7-Supplemental.pdf]

---

# Auditing Black-Box Prediction Models for Data Minimization Compliance (Supplementary Material)

---

**Bashir Rastegarpanah**  
Boston University  
bashir@bu.edu

**Krishna P. Gummadi**  
MPI-SWS  
gummadi@mpi-sws.org

**Mark Crovella**  
Boston University  
crovella@bu.edu

## A Setting

Figure 1 demonstrates our setting for auditing black-box prediction models as described in Section 3.

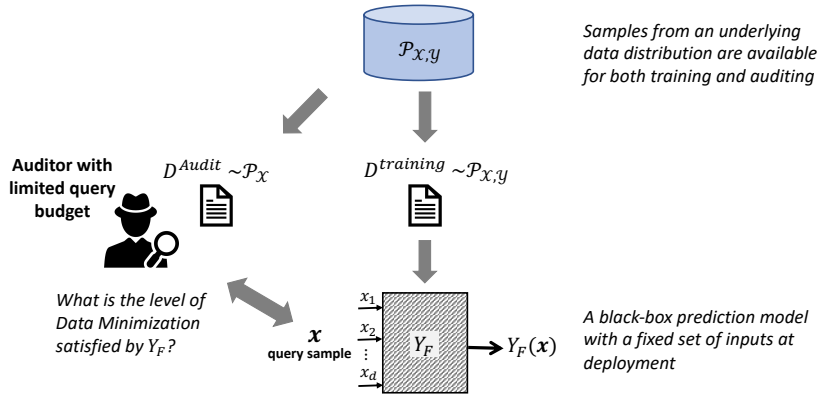

Figure 1

## **B Probabilistic Audit**

Figure 2 demonstrates examples of how the posterior distributions of model instability with respect to different simple imputations can be used to derive a probabilistic data minimization guarantee.

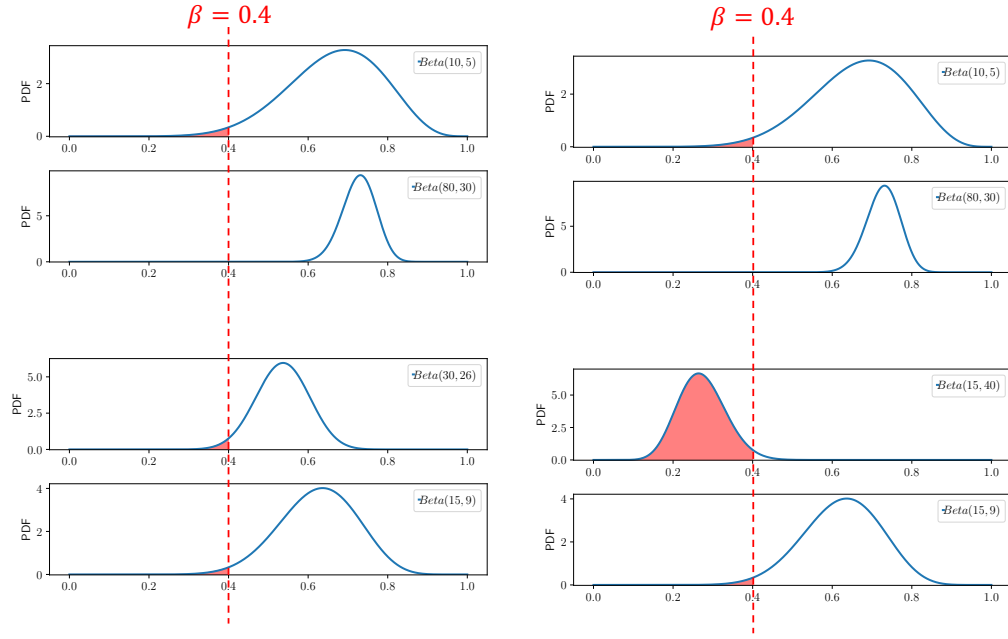

(a) Data minimization is satisfied.

(b) Data minimization is not satisfied.

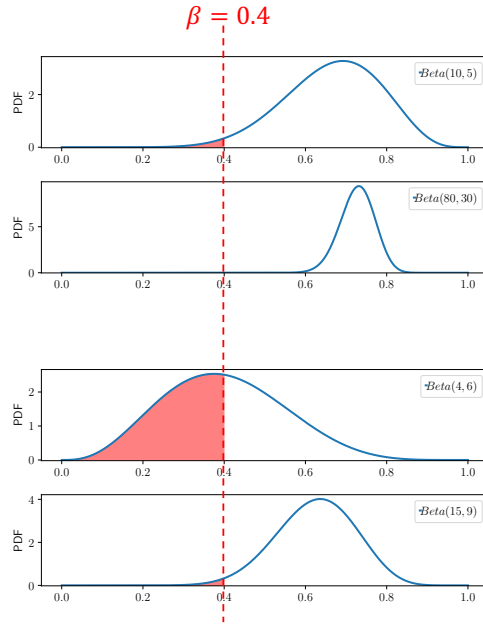

(c) An example of a situation where a decision cannot be made based on the posterior distributions.

Figure 2: Example posterior distributions of model instability with respect to different imputations, and a probabilistic data minimization audit at level 0.4 with 90% confidence.

## C Pseudocodes for Exploration Strategies

---

### Algorithm 1: Thompson Sampling (TS)

---

**Input:** Success and failure counters

```

1 for  $f_j \in F$  do
2   for  $b \in \mathcal{X}_j$  do
3      $\theta_j^b \sim \text{Beta}(x; S_j^b + a, F_j^b + c)$ 
4  $j^*, b^* = \text{argmin}_{j,b} \theta_j^b$ 
5 return  $(f_{j^*}, b^*)$ 

```

---



---

### Algorithm 2: Top-Two Thompson Sampling (TTTS)

---

**Input:** Success and failure counters

```

1 for  $f_j \in F$  do
2   for  $b \in \mathcal{X}_j$  do
3      $\theta_j^b \sim \text{Beta}(x; S_j^b + a, F_j^b + c)$ 
4  $j^*, b^* = \text{argmin}_{j,b} \theta_j^b$ 
5  $K \sim \text{Bernoulli}(1/2)$ 
6 if  $K=1$  then
7   return  $(f_{j^*}, b^*)$ 
8 else
9   repeat
10    for  $f_j \in F$  do
11      for  $b \in \mathcal{X}_j$  do
12         $\theta_j^b \sim \text{Beta}(x; S_j^b + a, F_j^b + c)$ 
13     $\tilde{j}, \tilde{b} = \text{argmin}_{j,b} \theta_j^b$ 
14    until  $(\tilde{j}, \tilde{b}) \neq (j^*, b^*)$ ;
15    return  $(f_{\tilde{j}}, \tilde{b})$ 

```

---



---

### Algorithm 3: Greedy

---

**Input:** Success and failure counters,  $\beta^*$

```

1 for  $f_j \in F$  do
2   for  $b \in \mathcal{X}_j$  do
3      $p_j^b = F_{\text{Beta}}(\beta^*; S_j^b + a, F_j^b + c)$ 
4  $j^*, b^* = \text{argmax}_{j,b} p_j^b$ 
5 return  $(f_{j^*}, b^*)$ 

```

---



---

### Algorithm 4: Probability Matching (PM)

---

**Input:** Success and failure counters,  $\beta^*$

```

1 for  $f_j \in F$  do
2   for  $b \in \mathcal{X}_j$  do
3      $p_j^b = F_{\text{Beta}}(\beta^*; S_j^b + a, F_j^b + c)$ 
4 Randomly choose an arm  $(f_j, b)$  with probability  $\frac{p_j^b}{\sum_{(f_j, b)} p_j^b}$ 
5 return  $(f_j, b)$ 

```

---
